Development 138, 1445 (2011) doi:10.1242/dev.065904  
© 2011. Published by The Company of Biologists Ltd

## Stage-specific signaling through TGF $\beta$ family members and WNT regulates patterning and pancreatic specification of human pluripotent stem cells

**M. Cristina Nostro, Farida Sarangi, Shinichiro Ogawa, Audrey Holtzinger, Barbara Corneo, Xueling Li, Suzanne J. Micallef, In-Hyun Park, Christina Basford, Michael B. Wheeler, George Q. Daley, Andrew G. Elefanty, Edouard G. Stanley and Gordon Keller**

There was an error published in *Development* **138**, 861-871.

In Fig. S5 in the supplementary material, in Stage 5 of Protocol 2 and Protocol 2 + Act, the medium should be SFD, not DMEM. In Fig. S10 in the supplementary material, in Stage 5 the medium should be SFD, not DMEM, and in the timeline d5 should be d3.

The authors apologise to readers for this mistake.
